# Supplementary material for: Tailoring supported palladium sulfide catalysts through H2-assisted sulfidation with H2S
Source: Royal Society of Chemistry journal article supplement (doi:10.1039/c3ta12277h), 2013-01-01
Supplement: c3ta12277h.pdf [file c3ta12277h.pdf]

# Tailoring Supported Palladium Sulfides Catalysts through H<sub>2</sub>-Assisted Sulfidation with H<sub>2</sub>S

Wei Xu, Jun Ni, Qunfeng Zhang, Feng Feng, Yizhi Xiang† and Xiaonian Li\*

State Key Laboratory Breeding Base of Green Chemistry Synthesis Technology,  
Industrial Catalysis Institute, Zhejiang University of Technology, Hangzhou, P. O. Box  
310014, P.R. China

## Supplementary material

### 1. Sample characterization

X-ray diffraction (XRD) measurements of the samples were performed using an X'Pert PRO diffractometer (PANalytical Co.) equipped with a Cu K $\alpha$  radiation source that was operated at 40 kV and 40 mA. Diffraction patterns were collected at a scanning rate of 2°/min and with a step of 0.02°. Foil samples were mounted on zero background quartz slides for analysis. The average size of particles was calculated by Scherrer equation.

Transmission electron microscopy (TEM) using a Tecnai G2 F30 S-Twin Microscope (Philips-FEI Co., Netherlands) was carried out to obtain the average size of the palladium sulfide nanoparticle supported activated carbon. At least 500 individual Pd particles were counted for each catalyst and the mean Pd particle size of the catalyst,  $d_s$ , was calculated by the following equation:  $d_s = \sum n_i d_i^3 / \sum n_i d_i^2$ , where visible particle size  $d_i$  on the micrographs was measured by a computerized system and  $n_i$  is the number of particles of diameter  $d_i$  and  $\sum n_i > 500$ . Energy-Dispersive X-ray Spectroscopy (EDS)

using a Thermo Noran Vantage EST instrument was used to obtain the S/Pd atomic ratio of individual particles of each single phase.

The BET surface areas of the Pd-based catalysts was determined by nitrogen physical adsorption at  $-196\text{ }^{\circ}\text{C}$ . A 0.05 g sample was heated to  $110\text{ }^{\circ}\text{C}$  and held at that temperature for 12 h to remove the adsorbed species; nitrogen adsorption isotherm was then performed using a NOVA 1000e surface area analyzer (Quantachrome Instruments Corp.).

The Sample of 0.05 g was purged in He at  $140\text{ }^{\circ}\text{C}$  for 2 h in a quartz ampoule, and then weakly bonded  $\text{H}_2\text{S}$  (i.e. physisorbed  $\text{H}_2\text{S}$ ) was removed. Then the sample was cooled to room temperature and the  $\text{H}_2$ -TPR experiments were carried out in the range of  $10\sim 850\text{ }^{\circ}\text{C}$  at a heating rate of  $10\text{ }^{\circ}\text{C}\cdot\text{min}^{-1}$  in 5% $\text{-H}_2/\text{Ar}$  with a flow rate of  $30\text{ mL}\cdot\text{min}^{-1}$ . The quantity of  $\text{H}_2\text{S}$  desorbed from the sample was measured every 2.5 min with a mass spectrometry (Omnistar TM). The reduction temperature was monitored by a thermocouple and the signal of  $\text{H}_2\text{S}$  ( $m/z=34$ ) was collected. The amounts of hydrogen consumption were calibrated using known amounts of CuO. And hydrogenation consumption for the reduction of “ $\text{Pd}_4\text{S}$ ”, “ $\text{Pd}_3\text{S}$ ” and “ $\text{PdS}$ ” phases were calculated as 11.5, 16.2 and  $48.1\text{ }\mu\text{mol}$ , which were in good agreement with the expected value of 11.8, 15.7 and  $47.2\text{ }\mu\text{mol}$ , respectively.

XPS measurements were performed on a Thermo ESCALAB 250 Axis Ultra spectrometer using a monochromatic Al  $K\alpha$  radiation ( $h\nu= 1486.6\text{ eV}$ ). Slight  $\text{Ar}^+$  sputtering was employed to remove surface impurities. All binding energy (BE)

values were calibrated by using the value of contaminant carbon (C 1s = 284.8eV) as a reference.

## 2. Characterization results

“Pd<sub>4</sub>S”, “Pd<sub>3</sub>S”, “Pd<sub>16</sub>S<sub>7</sub>”, “PdS” or mixed Pd-S crystalline phases supported on activated carbon could be selectively produced through the reaction of Pd/C with H<sub>2</sub>S/H<sub>2</sub>(Ar) at 150-950 °C for 3.5/8 h, and the XRD patterns of all the samples were summarized in Fig. S1-7. The results on the peak area and hydrogenation consumption of Pd<sub>4</sub>S/C(150 °C), Pd<sub>3</sub>S/C and PdS/C catalysts were shown in Fig. S8 and Table S1. The XRD patterns of spent Pd<sub>4</sub>S/C(150 °C) and PdS/C were shown in Fig. S9. The XPS results of Pd<sub>4</sub>S/C(150 °C) and PdS/C before and after the reaction were shown in Fig. S10-11 and Table S2-3.

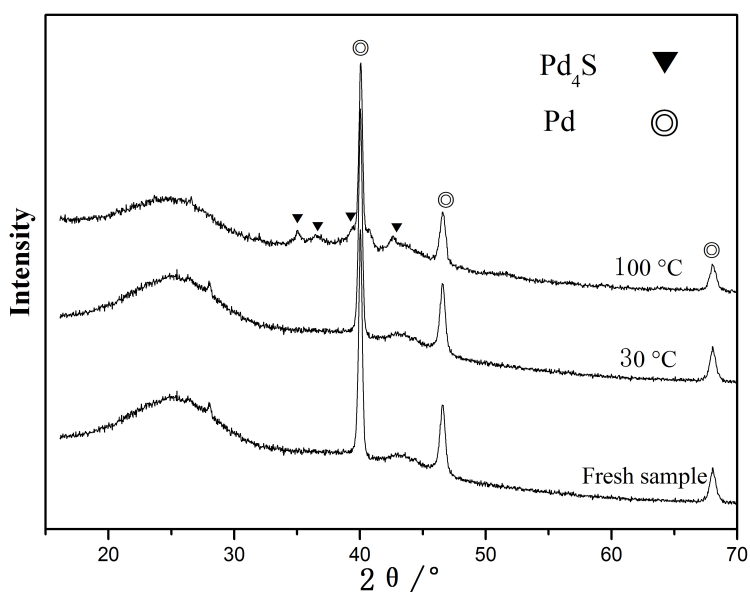

Fig. S1. XRD patterns of Pd/C reacted with H<sub>2</sub>S/H<sub>2</sub> at 30~100 °C for 3.5 h

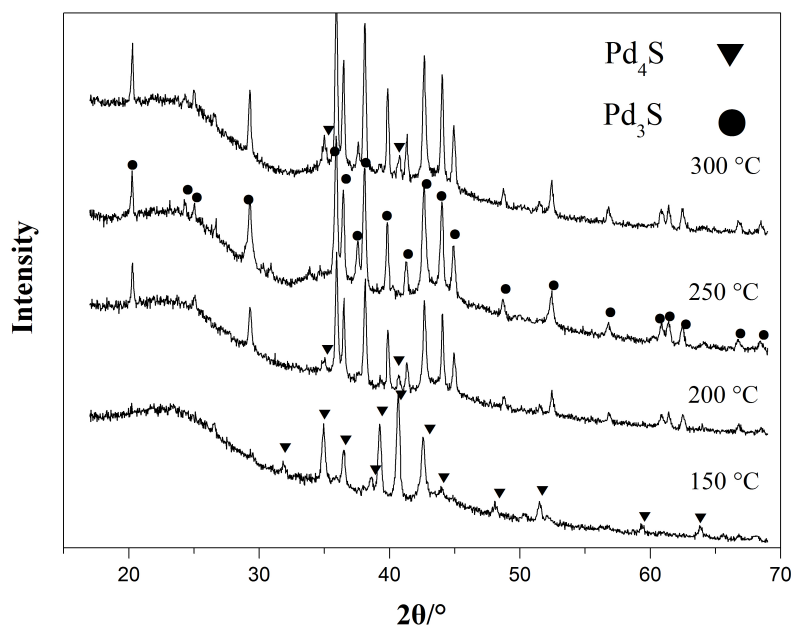

Fig. S2. XRD patterns of Pd/C reacted with H<sub>2</sub>S/H<sub>2</sub> at 150~300 °C for 3.5 h

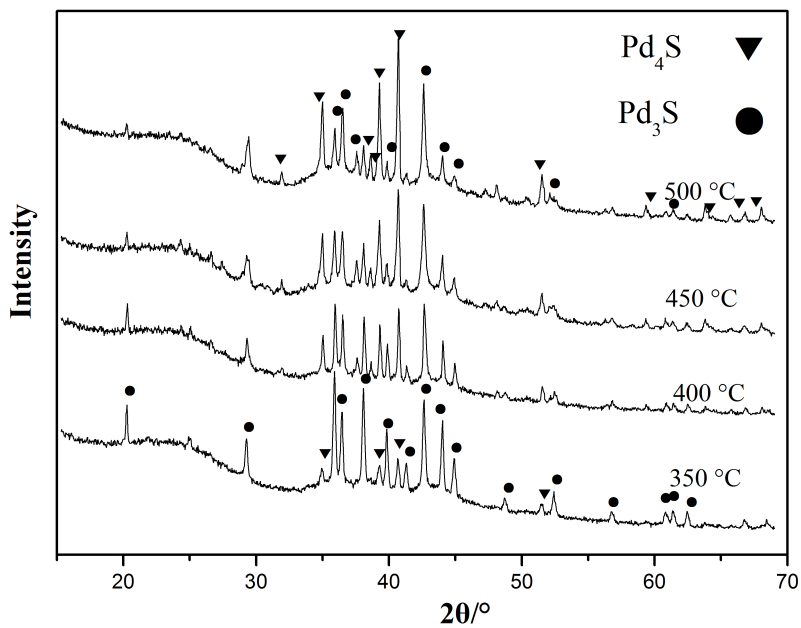

Fig. S3. XRD patterns of Pd/C reacted with H<sub>2</sub>S/H<sub>2</sub> at 350~500 °C for 3.5 h

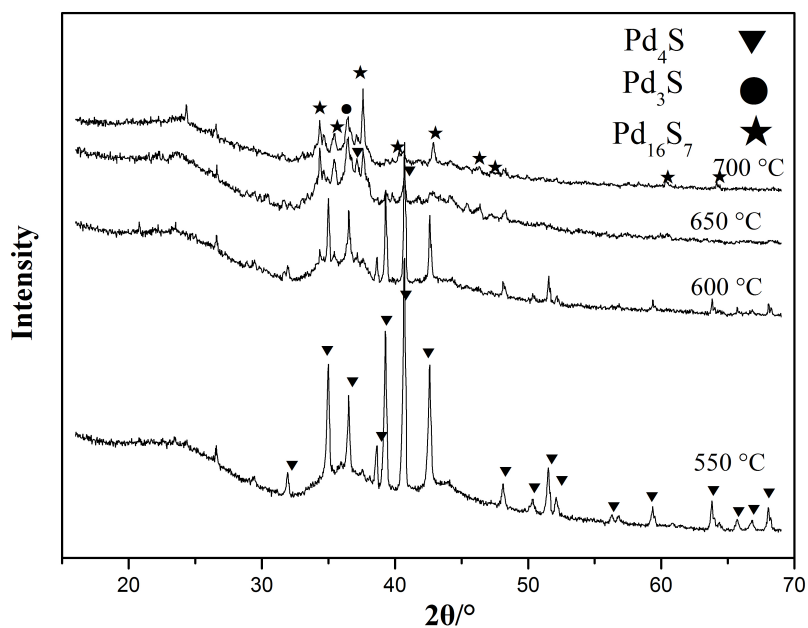

Fig. S4. XRD patterns of Pd/C reacted with H<sub>2</sub>S/H<sub>2</sub> at 550~700 °C for 3.5 h

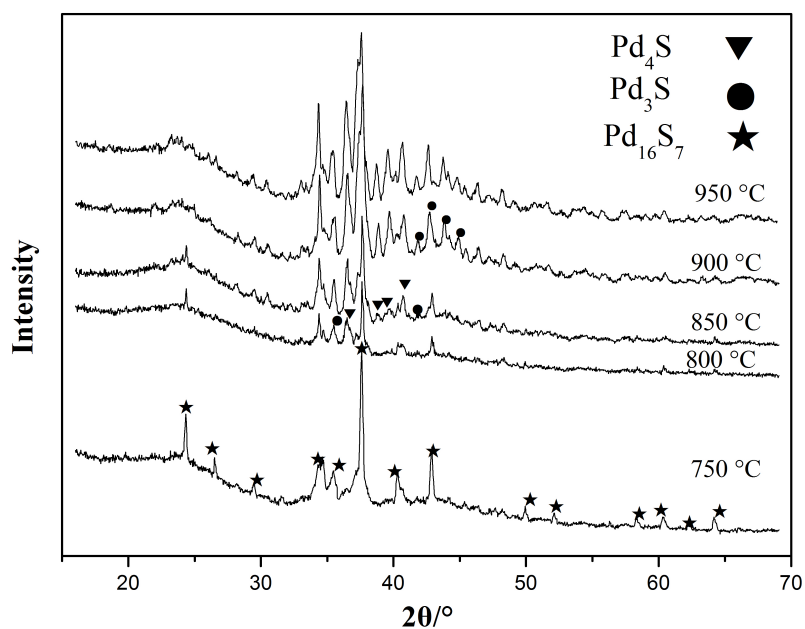

Fig. S5. XRD patterns of Pd/C reacted with H<sub>2</sub>S/H<sub>2</sub> at 750~950 °C for 3.5 h

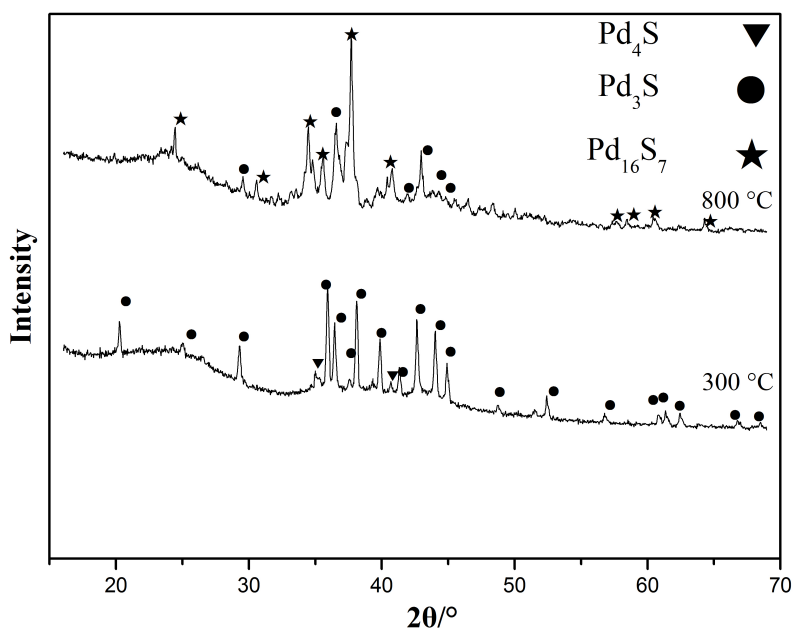

Fig. S6. XRD patterns of Pd/C reacted with  $\text{H}_2\text{S}/\text{H}_2$  at 300 and 800 °C for 8 h

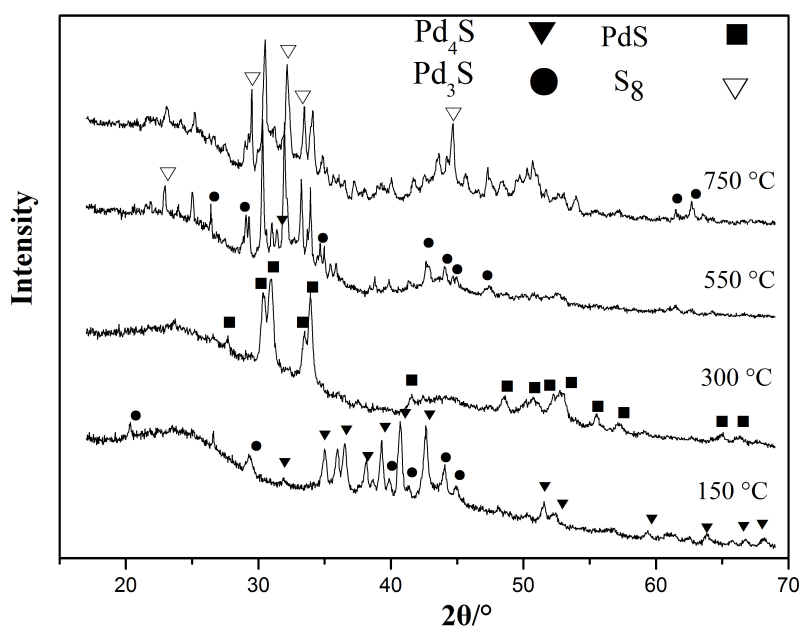

Fig. S7. XRD patterns of Pd/C reacted with  $\text{H}_2\text{S}/\text{Ar}$  at 150~750 °C for 3.5 h

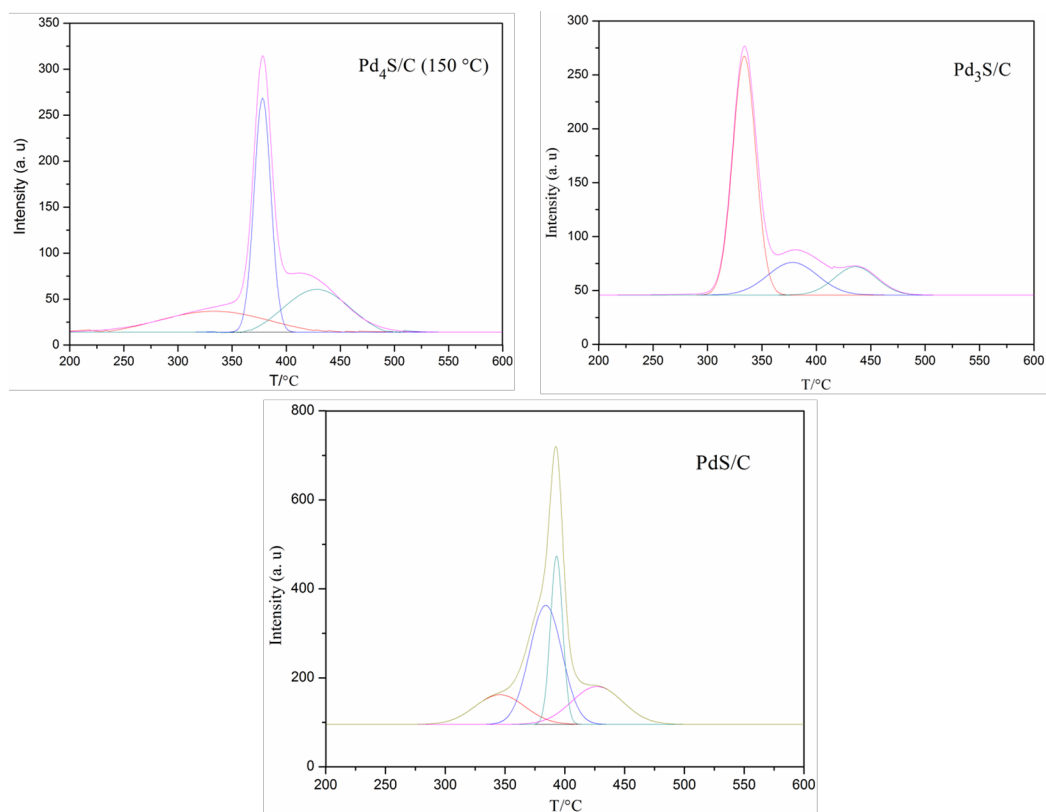

Fig. S8 H<sub>2</sub>-TPR analysis of Pd<sub>4</sub>S/C (150 °C), Pd<sub>3</sub>S/C and PdS/C catalysts

Table S1 The results on the peak area and hydrogenation consumption of Pd<sub>4</sub>S (150 °C),

Pd<sub>3</sub>S and PdS catalysts

| Crystal phase                         |                  | Pd <sub>4</sub> S(150 °C) |         | Pd <sub>3</sub> S |         | PdS     |         |
|---------------------------------------|------------------|---------------------------|---------|-------------------|---------|---------|---------|
| Peak position/°C                      |                  | 379                       | 338     | 380               | 343     | 384     | 393     |
| Peak area                             |                  | 4234.90                   | 4512.27 | 1452.98           | 3476.48 | 9289.58 | 4944.93 |
| Hydrogenation consumption / $\mu$ mol | Calculated value | 11.5                      | 16.2    |                   |         | 48.1    |         |
|                                       | Expected value   | 11.8                      | 15.7    |                   |         | 47.2    |         |

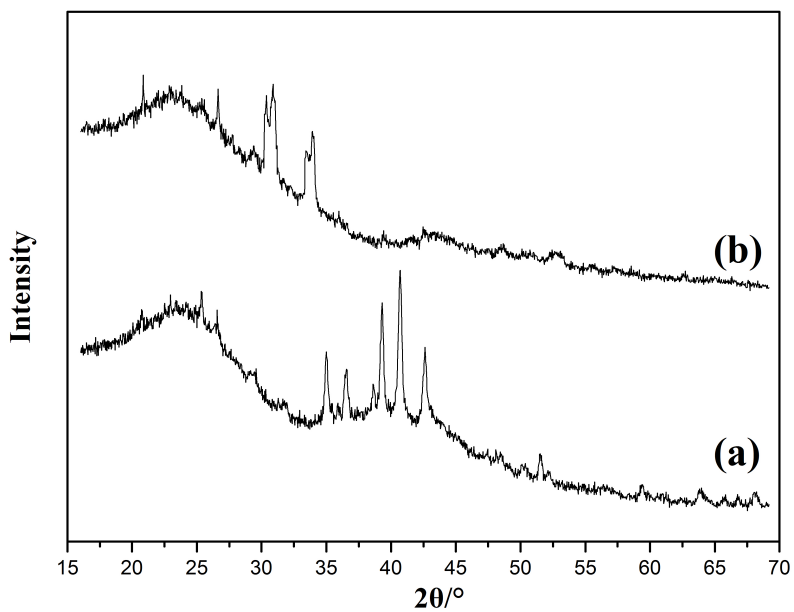

Fig. S9. XRD patterns of spent catalysts (a) Pd<sub>4</sub>S/C (150 °C) (b) PdS/C

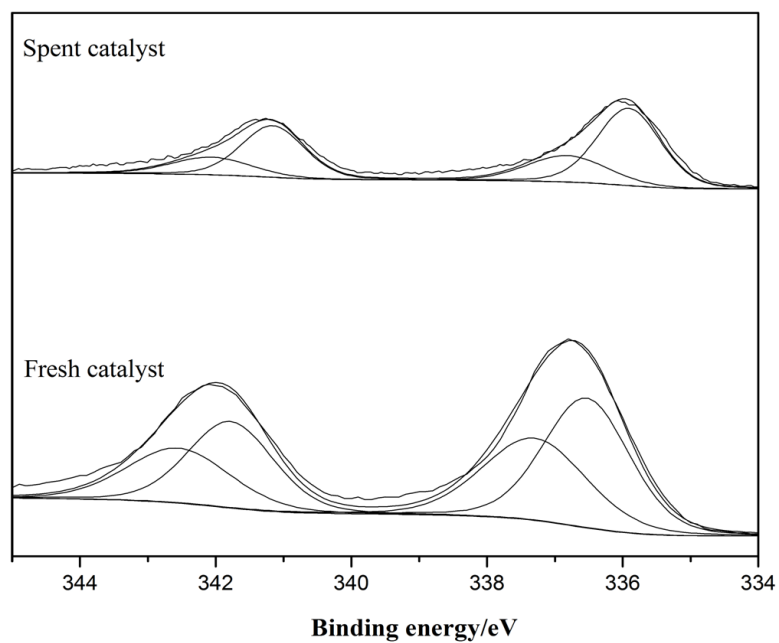

Fig. S10. XPS results of fresh Pd<sub>4</sub>S/C(150 °C) and spent Pd<sub>4</sub>S/C(150 °C)



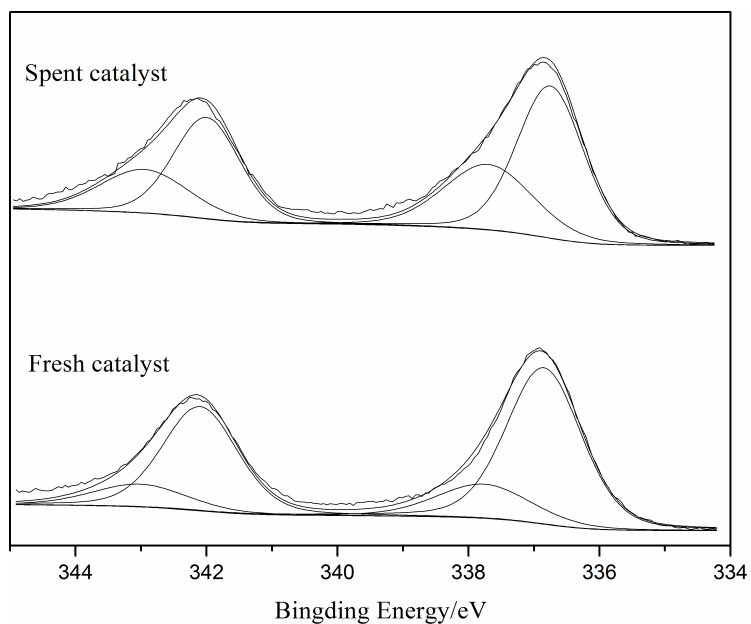

Fig. S11. XPS results of fresh PdS/C and spent PdS/C catalyst

**Table S2** The binding energy of Pd 3d<sub>5/2</sub> of Pd<sub>x</sub>S<sub>y</sub>/C with different phase structures

| Catalyst                           | Lower binding energy (BE) | Higher binding energy (BE) |
|------------------------------------|---------------------------|----------------------------|
| Pd <sub>4</sub> S/C(150 °C)        | 336.6                     | 337.4                      |
| Pd <sub>3</sub> S/C                | 336.3                     | 337.4                      |
| Pd <sub>4</sub> S/C(550 °C)        | 336.4                     | 337.7                      |
| Pd <sub>16</sub> S <sub>7</sub> /C | 336                       | 337.2                      |
| PdS/C                              | 336.9                     | 337.9                      |

**Table S3** The binding energy and Surface S/Pd atomic ratio of fresh and spent catalyst

| Catalyst                          | Lower binding energy (BE) | Higher binding energy (BE) | Surface S/Pd atomic ratio |
|-----------------------------------|---------------------------|----------------------------|---------------------------|
| Pd <sub>4</sub> S/C(150 °C)       | 336.6                     | 337.4                      | 1.02                      |
| Spent Pd <sub>4</sub> S/C(150 °C) | 335.9                     | 336.9                      | 0.28                      |
| PdS/C                             | 336.9                     | 337.9                      | 1.12                      |
| Spent PdS/C                       | 336.8                     | 337.7                      | 1.08                      |
